# Supplementary material for: Synthesis of Phospholipid-Protein Conjugates as New Antigens for Autoimmune Antibodies
Source: Molecules. 2015 Jun 3;20(6):10253–63. doi: 10.3390/molecules200610253 (PMC6272759; doi:10.3390/molecules200610253)
Supplement: Supplementary file 1 [file molecules-20-10253-s001.pdf]

# Supporting Information

## Synthesis of CL-COONHS (12)

To a solution of cardiolipin (CL) **1** (10 mg, 6.66  $\mu\text{mol}$ ) in 1.5 mL *t*BuOH 100  $\mu\text{L}$  aq. solution of  $\text{NaHCO}_3$  (10 mg in 100  $\mu\text{L}$ ) was added. Then the solutions of  $\text{NaIO}_4$  (30 mg in 200  $\mu\text{L}$  water) and  $\text{KMnO}_4$  (10 mg in 200  $\mu\text{L}$  water) were subsequently added. The reaction was mixed for 3 h and kept for 24 h at rt in dark. The reaction was controlled by TLC. After starting material was detected by TLC the reaction was quenched by adding 150 mg  $\text{Na}_2\text{SO}_3$ . After stirring for 5 min the reaction become colorless and two liquid phases separated. The mixture was acidified with 5% HCl til pH 3.0 and washed twice with *t*-BuOH. *t*-BuOH fraction was dried over  $\text{Na}_2\text{SO}_4$ , evaporated *in vacuo*. Yield 70%;  $R_f$  0.37 (chloroform:methanol:water 3:1.5:0.2, v/v/v), HRMS-ESI  $m/z$ : 1406.84772 ( $[\text{M} + \text{Na}]^+$ ,  $\text{C}_{72}\text{H}_{130}\text{Na}_2\text{O}_{19}\text{P}_2$  calcd 1406.84766).

To a solution of oxidized CL (5 mg) in 1 mL DMSO 4 mg succinimide ester in 20  $\mu\text{L}$  DMSO and 8  $\mu\text{L}$  *N,N'*-diisopropylcarbodiimide were added. After keeping the reaction at rt overnight TLC showed complete conversion of the starting material. The product was analyzed by HRMS-ESI and used in further steps without purification.  $R_f$  0.64 (chloroform:methanol:water 3:1.5:0.2, v/v/v), HRMS-ESI  $m/z$ : 1503.86409 ( $[\text{M} + \text{Na}]^+$ ,  $\text{C}_{76}\text{H}_{133}\text{NNa}_2\text{O}_{21}\text{P}_2$  calcd 1503.86405).

According to TLC, a mono-oxidized CL **12** was exclusively formed. Having analyzed previous reports on CL structure and having built a molecular model, we concluded that the most sterically accessible group has been oxidized (Scheme S1, Figure S1).

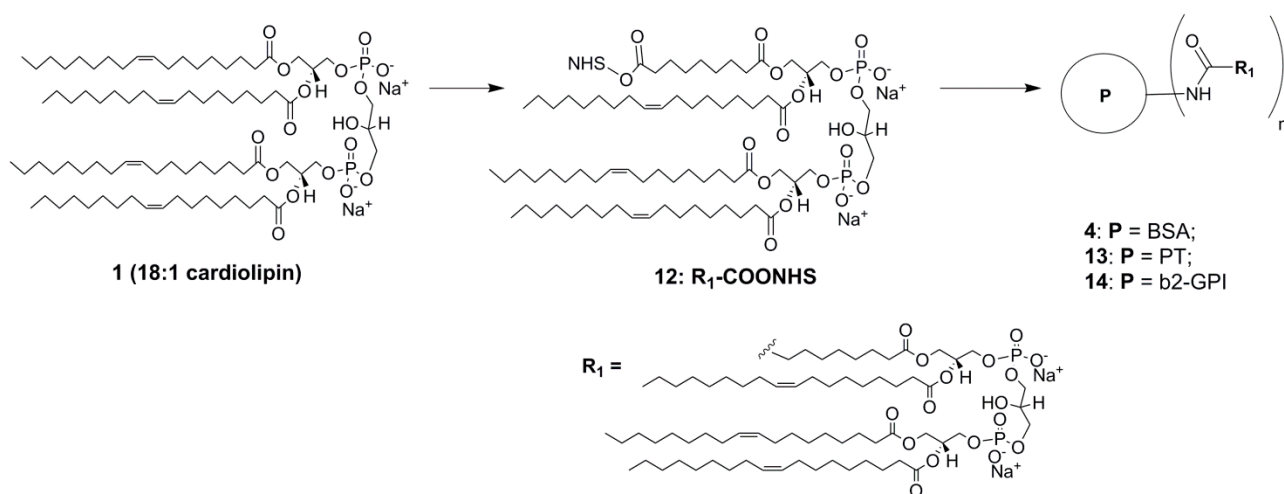

**Scheme S1.** Synthesis of oxidized cardiolipin (CL) and its protein conjugates.

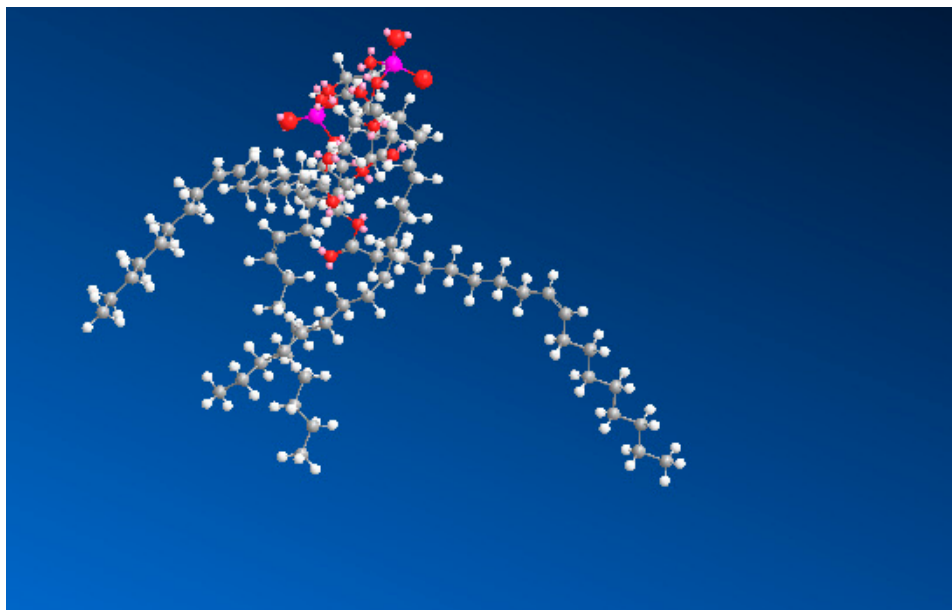

**Figure S1.** Molecular model of cardiolipin **1**. The model was build using MacroModel V9.1., and minimized using the Polak-Ribiere conjugate gradient method, the all-atom AMBER force field, and GB/SA solvation model [1].

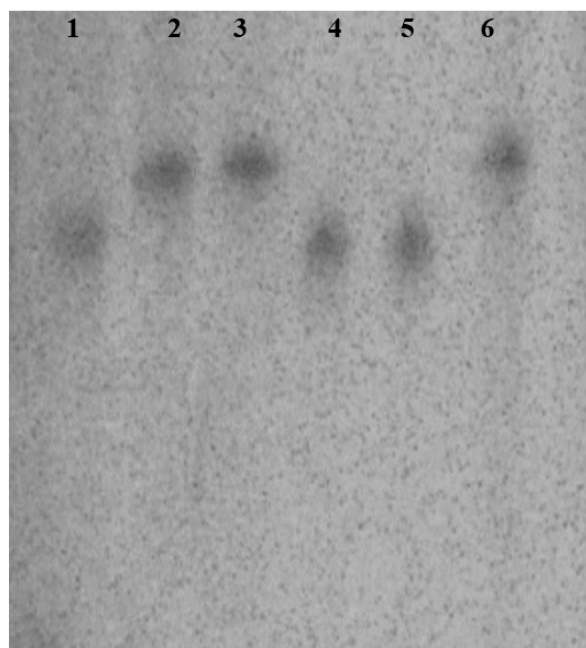

**Figure S2.** Representative SDS-PAGE gel electrophoresis of starting proteins (PT, BSA, lanes 1 and 4, respectively) and product conjugates **13** (lane 2), **6** (lane 3), **4** (lane 5), **5** (lane 6), using Coomassie stain.

### Synthesis of Phospholipid-Protein Conjugates (4, 13, 14)

Starting protein was dissolved in fresh 0.1 M bicarbonate buffer (0.2 mg in 180  $\mu$ L, pH 8.5) in 1.5 mL plastic Eppendorf tube. Cardiolipin NHS-ester (20  $\mu$ L of solution obtained in previous step) was added and the reaction was kept at rt overnight. The cardiolipin-labelled protein was precipitated from cold acetone, washed twice with acetone and re-dissolved in 200  $\mu$ L of 1 $\times$  PBS.

MALDI MS results (conjugate/unmodified protein, kDa (estimated amount of attached modifications,  $n$ )): **4**/BSA, 71.0–72.8/66.4 ( $n = 3$ –4); **13**/PT, 76.6–84.4/72.0 ( $n = 3$ –5); **14**/ $\beta$ 2GPI, 53.1–55.0/50.0 ( $n = 2$ –3);

**5**/BSA, 88.7–90.3/66.4 ( $n = 8$ –9); **6**/PT, 88.0–91.6/72.0 ( $n = 6$ –7); **7**/ $\beta$ 2GPI, 63.5–67.3/50.0 ( $n = 5$ –6).

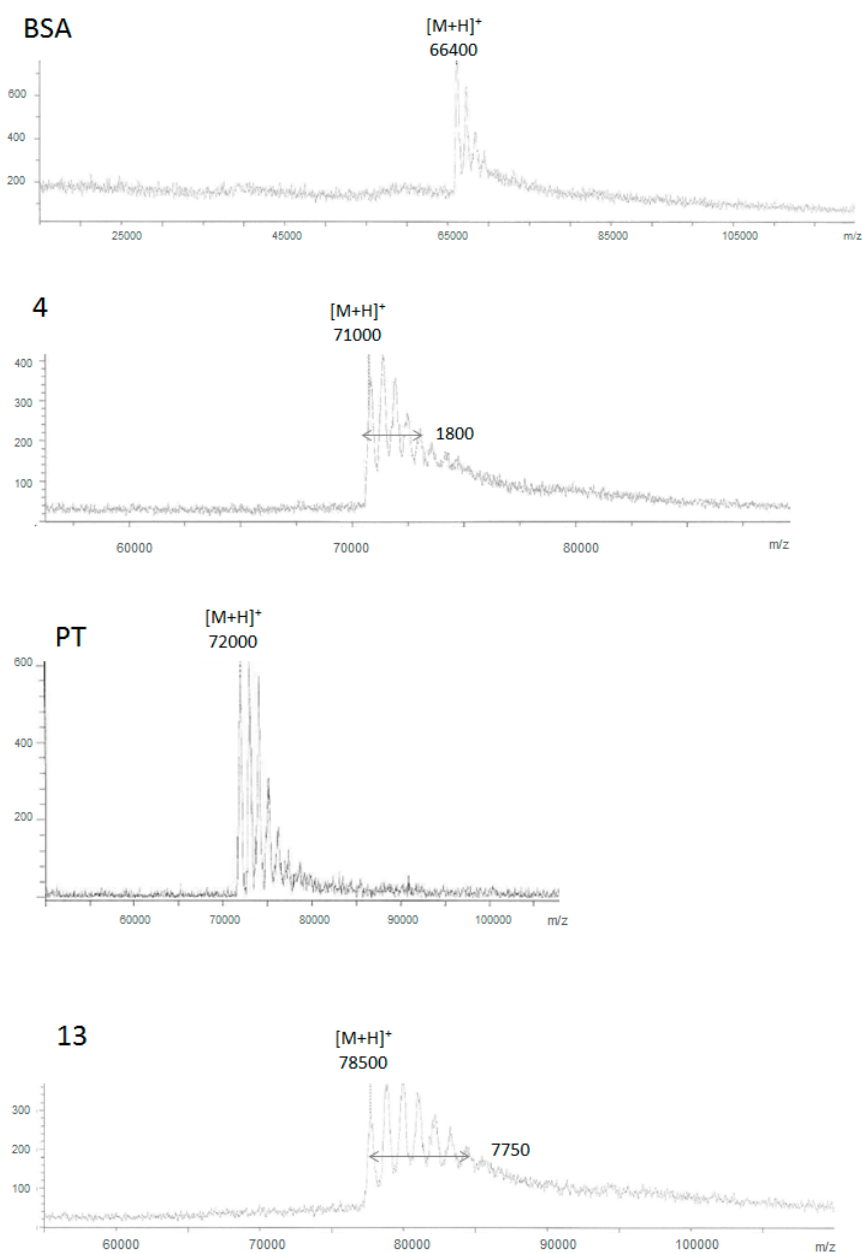

**Figure S3. Cont.**

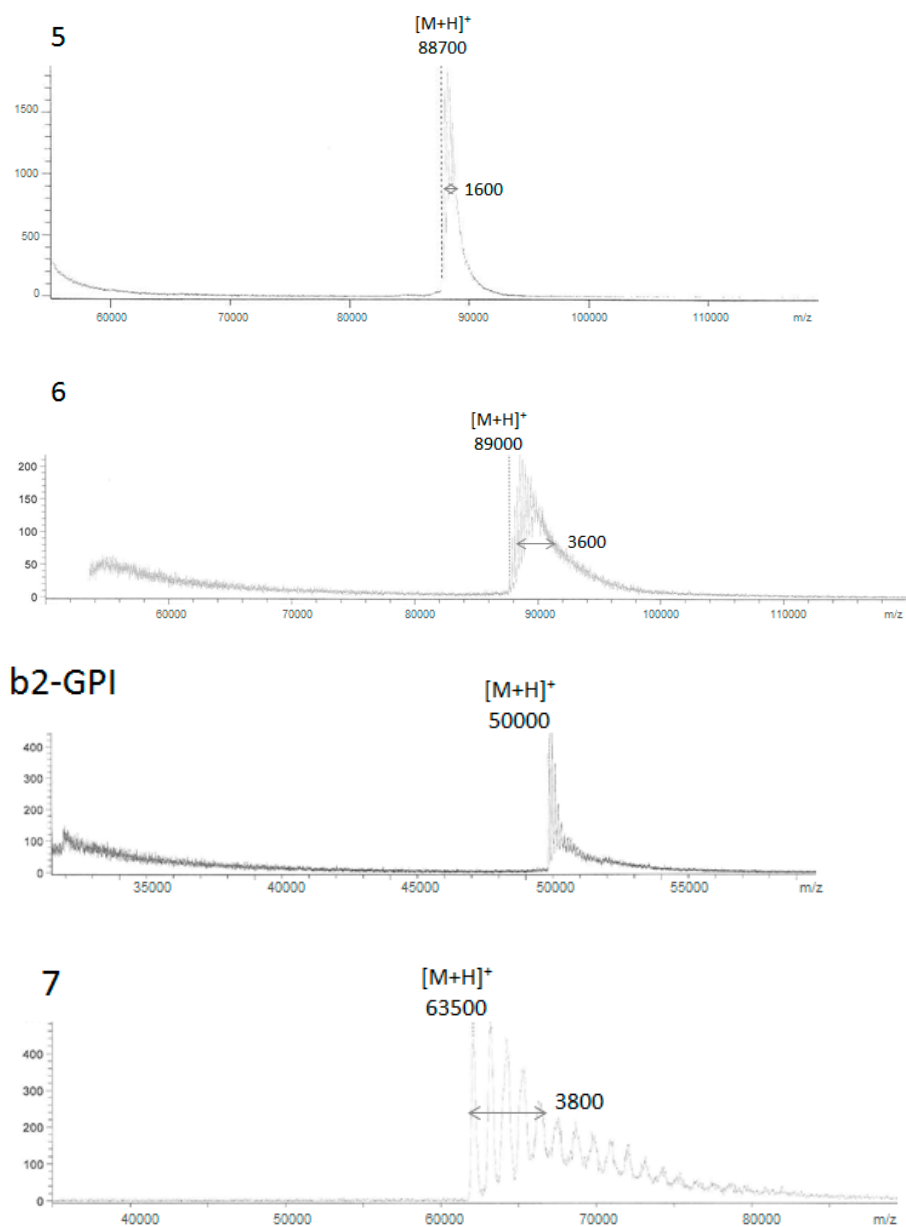

**Figure S3.** Representative mass spectra of proteins and phospholipid-protein conjugates prepared in this study. Double-headed arrows indicate approximate peak widths at half-height for the corresponding conjugates.

### "Clicked" CL- $\beta$ 2GPI IgG

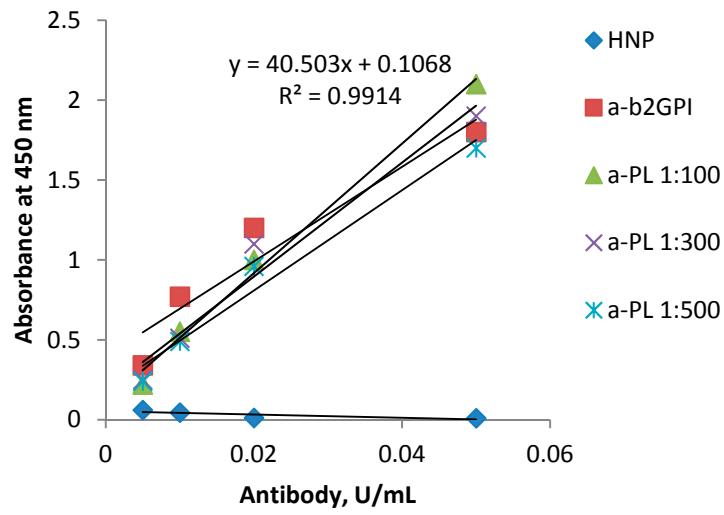

(A)

### CL(0) IgG

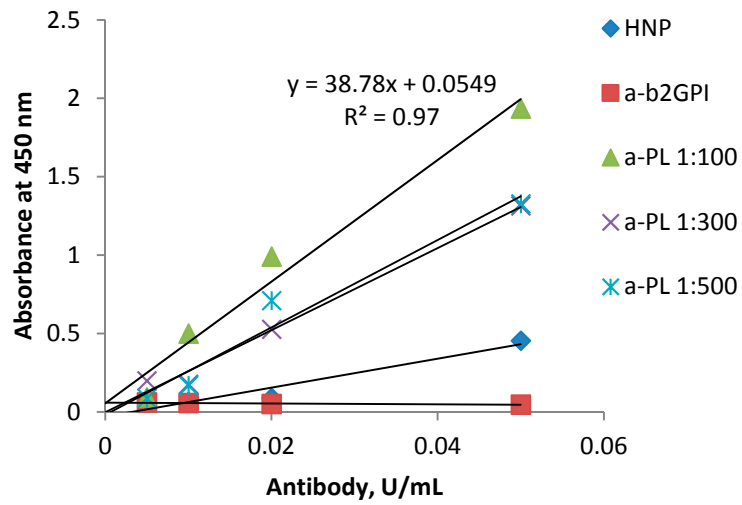

(B)

**Figure S4.** Representative determination of linear range of IgG ELISA assay using conjugate **7** (A) and unmodified CL (B). HNP = human normal plasma; a- $\beta$ 2GPI and a-PL are controls containing antibodies toward human  $\beta$ 2-GPI and PLs.

**Table S1.** Results of IgM ELISA assay using controls and conjugates prepared in this study \*.

| Antigen             | Absorbance at 450 nm |         |         |         |                      |
|---------------------|----------------------|---------|---------|---------|----------------------|
|                     | IgM                  |         |         |         | HNP ( <i>n</i> = 10) |
|                     | a-PL                 | a-β2GPI | a-ssDNA | a-dsDNA |                      |
| CL                  | 0.65                 | 0.11    | 0.45    | 0.32    | 0.11                 |
| β2GPI               | 0.52                 | 0.55    | 0.43    | 0.21    | 0.32                 |
| CL:β2GPI §          | 0.50                 | 0.45    | 0.39    | 0.15    | 0.40                 |
| PT                  | 0.33                 | 0.20    | 0.50    | 0.14    | 0.22                 |
| BSA                 | 0.22                 | 0.28    | 0.43    | 0.33    | 0.20                 |
| PE azide            | 0.40                 | 0.10    | 0.32    | 0.11    | 0.09                 |
| <b>5 (BSA-PE)</b>   | 0.82                 | 0.33    | 0.68    | 0.22    | 0.65                 |
| <b>6 (PT-PE)</b>    | 1.01                 | 0.24    | 0.79    | 0.15    | 0.74                 |
| <b>7 (β2GPI-PE)</b> | 0.99                 | 1.11    | 0.82    | 0.22    | 0.26                 |

§ β2GPI (0.001%) was added to CL under blocking conditions resulting in non-covalent binding. \* a-PL, a-ssDNA and a-dsDNA = human plasma tested highly positive against phospholipids; single-stranded and double-stranded DNA, respectively; a-β2GPI is a monoclonal antibody towards β2-glycoprotein I (β2GPI). HNP = human normal plasma; averaged absorbance for *n* patients is presented ( $\Delta \pm 0.20$ ). CL = cardiolipin, PT = prothrombin. Each sample was measured in the duplicate with resulting deviation in absorbance  $\Delta \pm 0.20$ .

**Table S2.** Results of IgG and IgM ELISA assay using conjugates **4**, **13** and **14** containing oxidized cardiolipin \*.

| Antigen              | Absorbance at 450 nm |             |             |             |                      |
|----------------------|----------------------|-------------|-------------|-------------|----------------------|
|                      | IgG (IgM)            |             |             |             | HNP ( <i>n</i> = 10) |
|                      | a-PL                 | a-β2-GPI    | a-ssDNA     | a-dsDNA     |                      |
| <b>4 (BSA-CL)</b>    | 0.83 (1.12)          | 0.36 (0.43) | 0.82 (0.70) | 0.21 (0.52) | 0.51 (0.89)          |
| <b>13 (PT-CL)</b>    | 0.71 (0.89)          | 0.44 (0.44) | 1.01 (0.69) | 0.72 (0.45) | 0.45 (0.65)          |
| <b>14 (β2GPI-CL)</b> | 0.77 (0.88)          | 1.21 (0.67) | 0.54 (0.80) | 0.47 (0.32) | 0.55 (0.54)          |

\* For details see Tables 1 and S1.

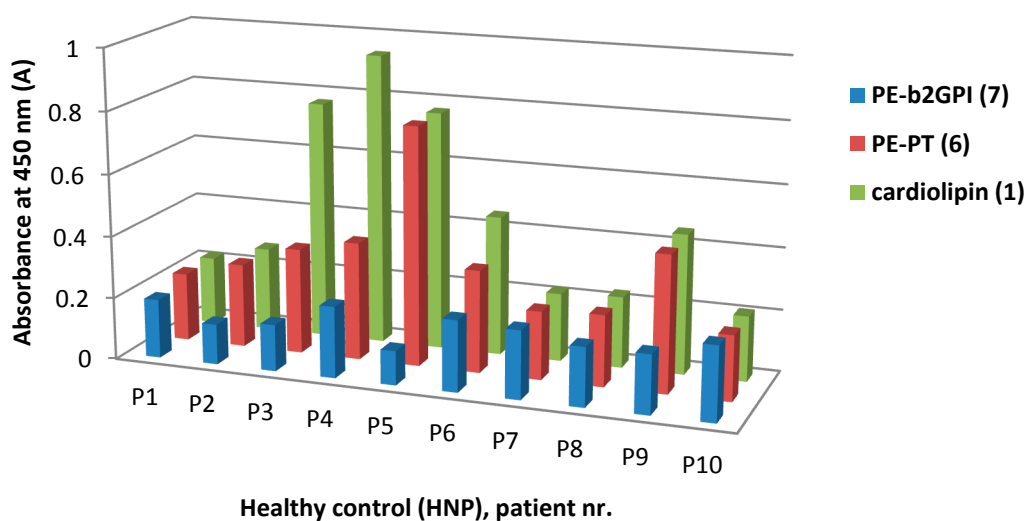

**Figure S5.** Results of IgG ELISA assay of healthy control samples (HNP,  $n = 10$ ) using CL and conjugates 6–7. Weakly positive result: absorbance (A) > 0.4; medium range positive result: A > 0.65.

## Reference

1. Jørgensen, A.S.; Gupta, P.; Wengel, J.; Astakhova, I.K. “Clickable” LNA/DNA probes for fluorescence sensing of nucleic acids and autoimmune antibodies. *Chem. Commun.* **2013**, 49, 10751–10753.
